# Supplementary material
Source: PubMed Central journal article supplement (PMC3110546)
Supplement: NIHMS291063-supplement-1.pdf [file NIHMS291063-supplement-1.pdf]

Supplemental Figure 1. Zhu et al.

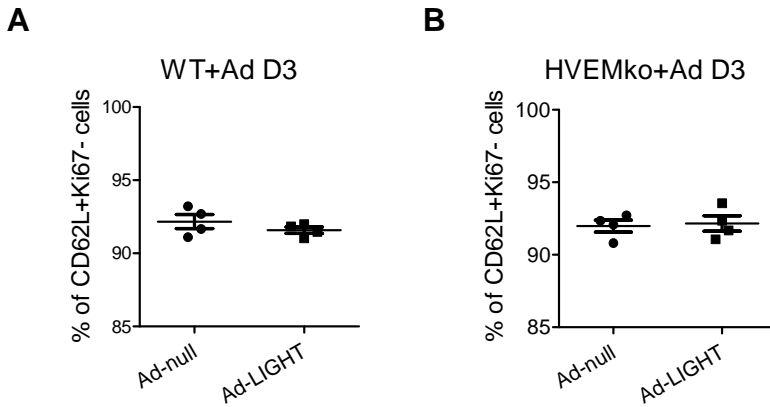

**Supplementary Figure 1. Ad-LIGHT does not promote lymphocytes proliferation during LN hypertrophy.**

WT or HVEM<sup>-/-</sup> mice were immunized with  $5 \times 10^{10}$  VP of Ad-null or Ad-LIGHT intradermally on the tail base. 3 days later, DLN cells were collected and stained with anti-CD62L and anti-Ki-67. CD62L+Ki-67<sup>-</sup> cells are defined as naïve non-proliferating cells.
