# Supplementary material
Source: PubMed Central journal article supplement (PMC3110546)
Supplement: NIHMS291063-supplement-2.pdf [file NIHMS291063-supplement-2.pdf]

## Supplemental Figure 2. Zhu et al.

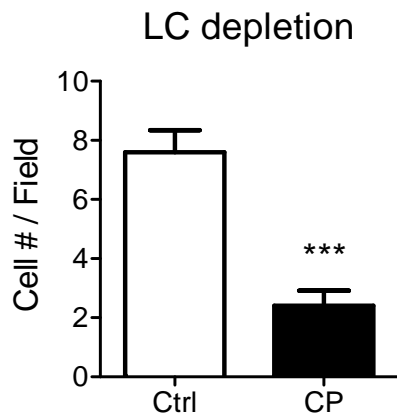

### **Supplementary Figure 2. Langerhans cell depletion by clobetasol propionate.**

Shaved tail base skin of WT mice was topically treated with DMSO or 0.1%CP in DMSO for 4 consecutive days. Mice were rested for 2wks. Treated skins were embedded in OCT and epidermal LC was determined by immunohistochemistry staining with antibody against CD207. LC number from 5 high power fields was counted and analyzed. \*\*\*,  $P < 0.001$ .
